# Supplementary material
Source: Royal Society of Chemistry journal article supplement (doi:10.1039/d6cp00447d)
Supplement: d6cp00447d1.pdf [file d6cp00447d1.pdf]

## Supporting Information

### **Investigating the Molecular Mechanism by Which Natural Polyamines Alter the Conformational Stability and Dynamics of Lysozyme**

**Manisha Yadav<sup>a</sup>, Vijayakumar Rajendran<sup>b</sup>, Sumit Kumar<sup>a</sup>, Aswani V<sup>a</sup>, Muhammed Anhal<sup>a</sup>, Saraboji Kadhivel<sup>c</sup>, and Rajesh Kumar<sup>a\*</sup>**

*<sup>a</sup>Department of Chemistry, School of Basic Sciences, Central University of Punjab, Ghudda, Bathinda, 151401, India*

*<sup>b</sup>Computational and Data Sciences, Indian Institute of Science, Bangalore – 560012, India*

*<sup>c</sup>Department of Computational Sciences, School of Basic Sciences, Central University of Punjab, Bathinda 151401, India*

\*Correspondence: Rajesh Kumar  
Email: [rajeshchem01@gmail.com](mailto:rajeshchem01@gmail.com)

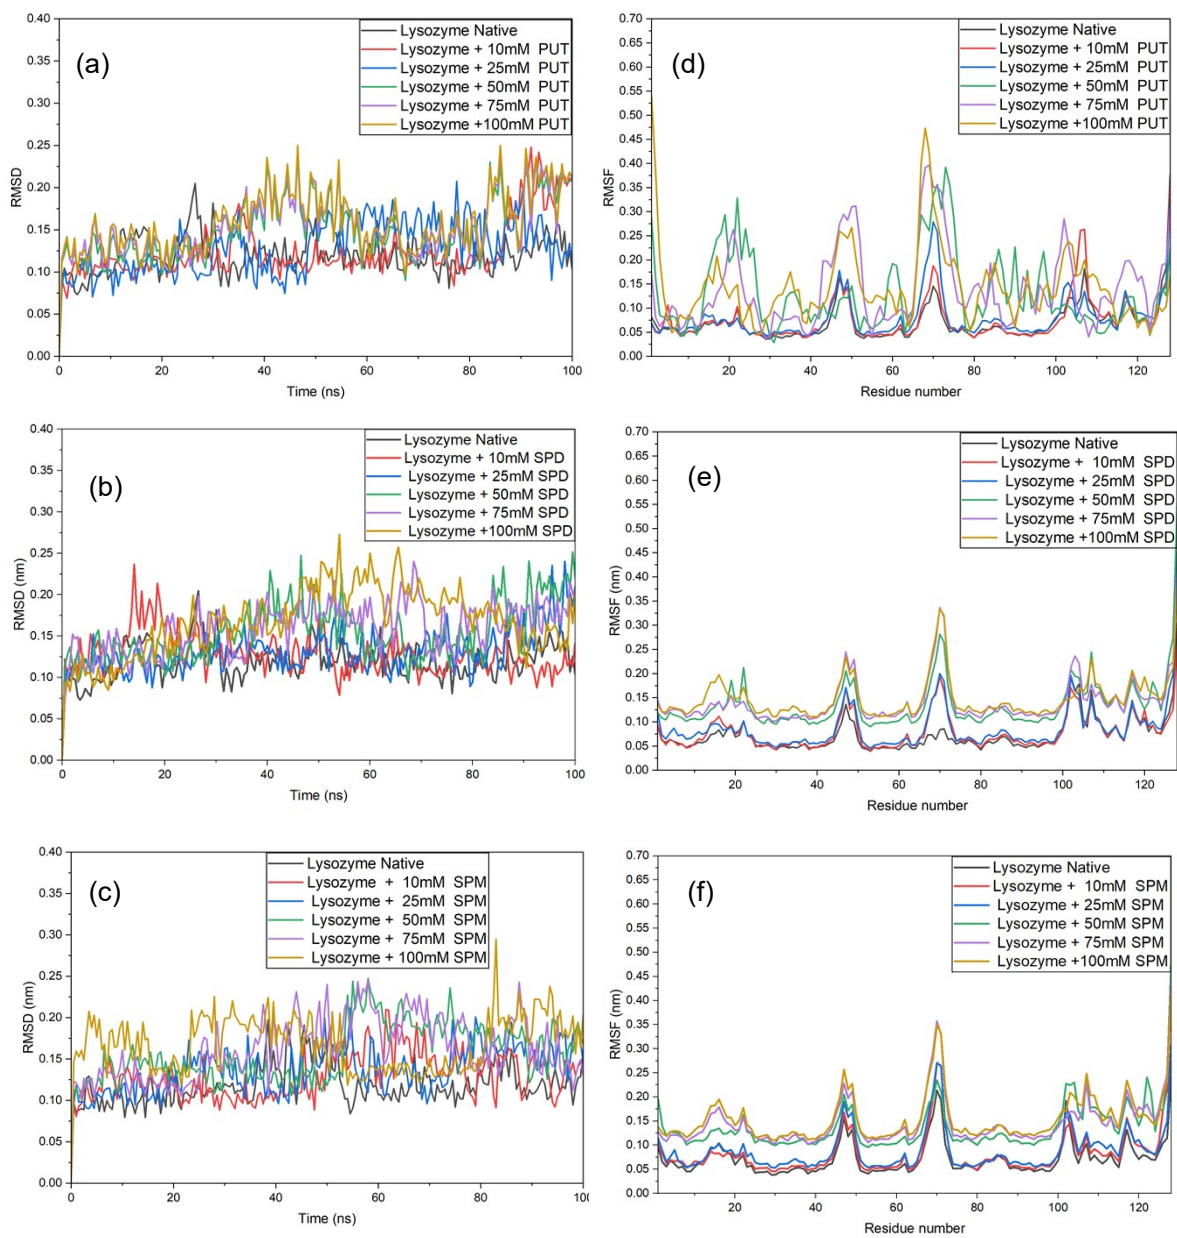

**Fig. S1:** Panels (A), (B), and (C) represent the RMSD of HEWL in the presence of different concentrations of PUT, SPD, and SPM, respectively, at pH 4.4. Panels (D), (E), and (F) represent the RMSF of HEWL in the presence of different concentrations of PUT, SPD, and SPM, respectively, at a pH of 4.4.

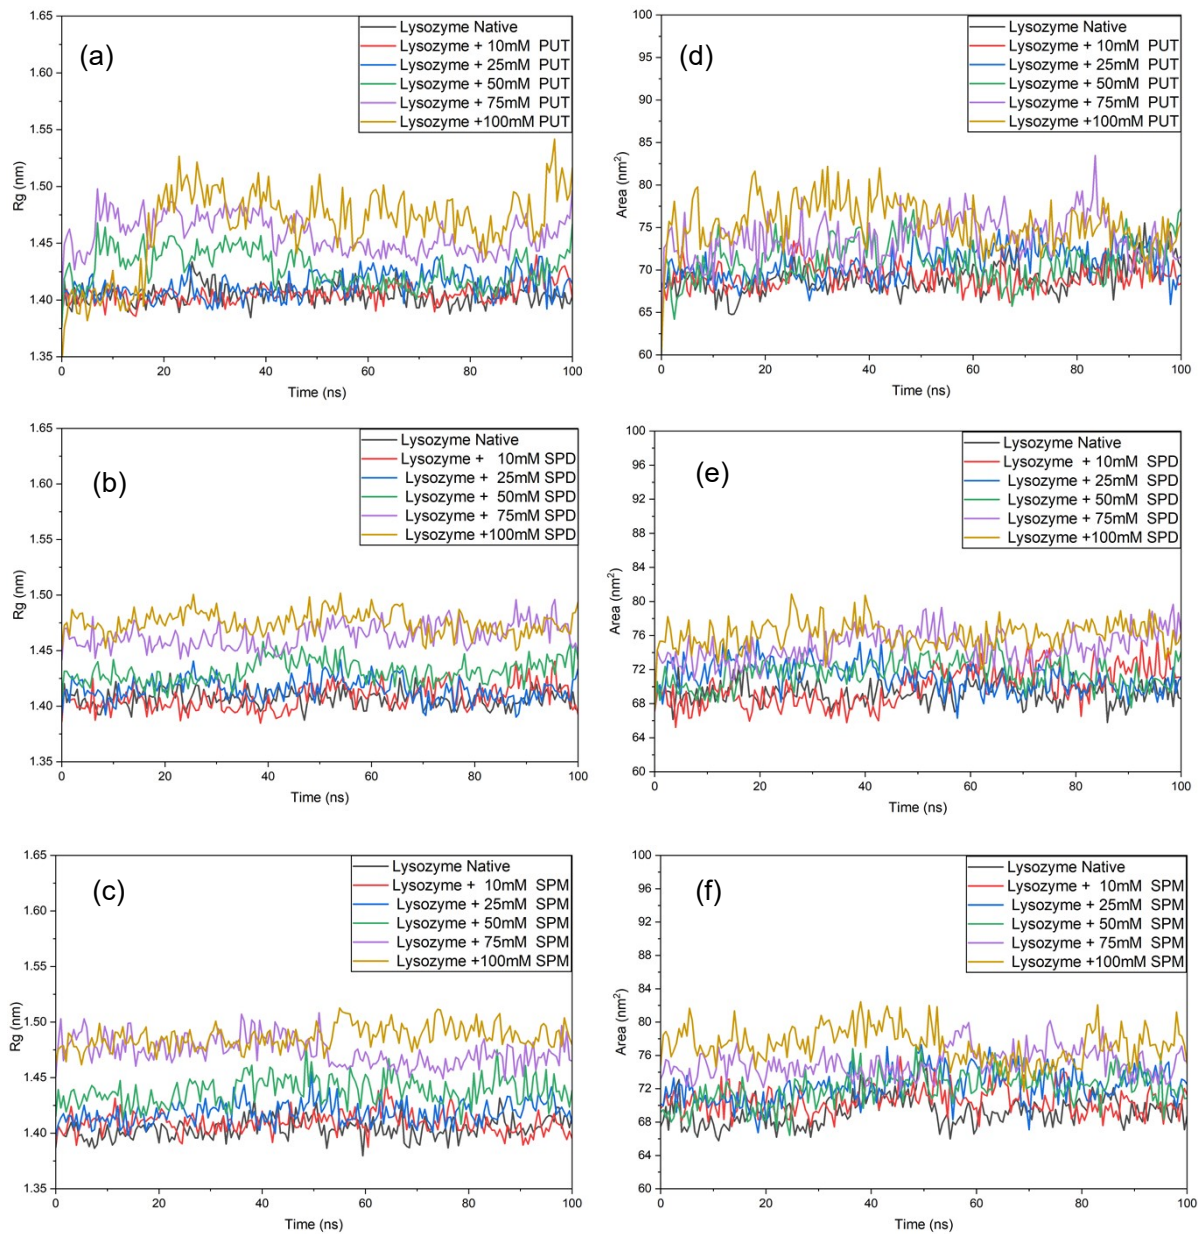

**Fig. S2:** Panels (A), (B), and (C) represent the  $R_g$  values of HEWL in the presence of different concentrations of PUT, SPD, and SPM, respectively, at pH 4.4. Panels (D), (E), and (F) represent the SASA of HEWL in the presence of different concentrations of PUT, SPD, and SPM, respectively, at a pH of 4.4.

**Table S1:** PAs effect on the average RMSD,  $R_g$ , RMSF, SASA, and H-bonds of native HEWL, at pH 4.4

| System          | Average RMSD (nm) | Average RMSF (nm) | Average $R_g$ (nm) | Average SASA (nm <sup>2</sup> ) | Average H-bonds (Total H-bonds b/w HEWL and PA) |
|-----------------|-------------------|-------------------|--------------------|---------------------------------|-------------------------------------------------|
| <b>PUT</b>      |                   |                   |                    |                                 |                                                 |
| HEWL+0.0 M PAs  | 0.119±0.023       | 0.071±0.04        | 1.404±0.008        | 69.28±1.73                      | --                                              |
| HEWL+10 mM PUT  | 0.125±0.034       | 0.076±0.05        | 1.407±0.006        | 69.17±1.46                      | 0.02±0.14 (4)                                   |
| HEWL+25 mM PUT  | 0.129±0.032       | 0.080±0.05        | 1.413±0.011        | 70.21±1.90                      | 0.09±0.35 (19)                                  |
| HEWL+50 mM PUT  | 0.149±0.044       | 0.131±0.06        | 1.428±0.016        | 71.08±2.51                      | 0.70±1.01 (142)                                 |
| HEWL+75 mM PUT  | 0.154±0.036       | 0.139±0.09        | 1.458±0.016        | 73.78±2.63                      | 1.59±1.50 (319)                                 |
| HEWL+100mM PUT  | 0.158±0.061       | 0.144±0.08        | 1.466±0.035        | 75.46±2.79                      | 3.13±2.14 (630)                                 |
| <b>SPD</b>      |                   |                   |                    |                                 |                                                 |
| HEWL +0.0 M PAs | 0.119±0.023       | 0.072±0.07        | 1.407±0.008        | 69.27±1.23                      | --                                              |
| HEWL+10 mM SPD  | 0.127±0.025       | 0.079±0.08        | 1.408±0.013        | 69.94±2.19                      | 0.035±0.30 (6)                                  |
| HEWL+25 mM SPD  | 0.132±0.027       | 0.086±0.05        | 1.415±0.022        | 71.16±1.70                      | 0.110±0.56 (22)                                 |
| HEWL+50 mM SPD  | 0.154±0.035       | 0.135±0.09        | 1.431±0.041        | 71.57±1.63                      | 1.05±1.08 (215)                                 |
| HEWL+75 mM SPD  | 0.159±0.031       | 0.142±0.07        | 1.464±0.056        | 74.62±1.90                      | 2.52±1.60 (515)                                 |
| HEWL+100mM SPD  | 0.164±0.040       | 0.149±0.04        | 1.475±0.010        | 76.17±1.52                      | 4.18±2.68 (856)                                 |
| <b>SPM</b>      |                   |                   |                    |                                 |                                                 |
| HEWL +0.0 M PAs | 0.118±0.024       | 0.072±0.03        | 1.404±0.008        | 69.33±1.77                      | --                                              |
| HEWL+10 mM SPM  | 0.129±0.028       | 0.083±0.05        | 1.409±0.025        | 70.56±1.58                      | 0.069±0.45 (8)                                  |
| HEWL+25 mM SPM  | 0.136±0.021       | 0.088±0.04        | 1.418±0.011        | 72.36±1.98                      | 0.173±0.83 (35)                                 |
| HEWL+50 mM SPM  | 0.157±0.036       | 0.137±0.05        | 1.438±0.016        | 72.00±1.97                      | 1.41±1.36 (288)                                 |
| HEWL+75 mM SPM  | 0.162±0.045       | 0.146±0.08        | 1.473±0.022        | 75.11±1.70                      | 2.74±1.27 (560)                                 |
| HEWL+100mM SPM  | 0.168±0.036       | 0.154±0.05        | 1.486±0.035        | 77.32±2.06                      | 4.67±3.59 (956)                                 |
